# Purified Human Pancreatic Duct Cell Culture Conditions Defined by Serum-Free High-Content Growth Factor Screening

Corinne A. Hoesli<sup>1\*</sup>, James D. Johnson<sup>2,3</sup>, James M. Piret<sup>1</sup>

**1** Michael Smith Laboratories and Department of Biological and Chemical Engineering, University of British Columbia, Vancouver, Canada, **2** Department of Surgery, University of British Columbia, Vancouver, Canada, **3** Department of Cellular and Physiological Sciences, University of British Columbia, Vancouver, Canada

## Abstract

The proliferation of pancreatic duct-like CK19+ cells has implications for multiple disease states including pancreatic cancer and diabetes mellitus. The *in vitro* study of this important cell type has been hampered by their limited expansion compared to fibroblast-like vimentin+ cells that overgrow primary cultures. We aimed to develop a screening platform for duct cell mitogens after depletion of the vimentin+ population. The CD90 cell surface marker was used to remove the vimentin+ cells from islet-depleted human pancreas cell cultures by magnetic-activated cell sorting. Cell sorting decreased CD90+ cell contamination of the cultures from 34±20% to 1.3±0.6%, yielding purified CK19+ cultures with epithelial morphology. A full-factorial experimental design was then applied to test the mitogenic effects of bFGF, EGF, HGF, KGF and VEGF. After 6 days in test conditions, the cells were labelled with BrdU, stained and analyzed by high-throughput imaging. This screening assay confirmed the expected mitogenic effects of bFGF, EGF, HGF and KGF on CK19+ cells and additionally revealed interactions between these factors and VEGF. A serum-free medium containing bFGF, EGF, HGF and KGF led to CK19+ cell expansion comparable to the addition of 10% serum. The methods developed in this work should advance pancreatic cancer and diabetes research by providing effective cell culture and high-throughput screening platforms to study purified primary pancreatic CK19+ cells.

**Citation:** Hoesli CA, Johnson JD, Piret JM (2012) Purified Human Pancreatic Duct Cell Culture Conditions Defined by Serum-Free High-Content Growth Factor Screening. PLoS ONE 7(3): e33999. doi:10.1371/journal.pone.0033999

**Editor:** Kathrin Maedler, University of Bremen, Germany

**Received:** October 28, 2011; **Accepted:** February 22, 2012; **Published:** March 19, 2012

**Copyright:** © 2012 Hoesli et al. This is an open-access article distributed under the terms of the Creative Commons Attribution License, which permits unrestricted use, distribution, and reproduction in any medium, provided the original author and source are credited.

**Funding:** This work was supported by grants from the Michael Smith Foundation for Health Research Centre for Human Islet Transplantation and Beta-cell Regeneration (CHITBR) and the Canadian Stem Cell Network (#PA5). CAH was supported by fellowships from the Michael Smith Foundation for Health Research, Le Fonds québécois de la recherche sur la nature et les technologies and the Natural Sciences and Engineering Research Council of Canada. The funders had no role in study design, data collection and analysis, decision to publish, or preparation of the manuscript.

**Competing Interests:** The authors have declared that no competing interests exist.

\* E-mail: corinne.hoesli@gmail.com

## Introduction

The pancreas is a complex organ containing multiple interspersed cell types with diverse exocrine and endocrine functions. Established protocols exist for isolating, studying and transplanting relatively pure cultures of endocrine islet cells [1,2,3], but the culture of enriched CK19-positive ductal cells has proven challenging. Human CK19-positive cells are an interesting cell population [4] as they have been shown to proliferate in several disease states, including pancreatic ductal adenocarcinoma [5] and diabetes [6]. Some groups have also suggested that cells with a ductal phenotype, potentially centroacinar cells [7], have the potential to express measurable amounts of insulin *in vitro* [8,9,10,11,12] or *in vivo* after pancreas injury [12,13]. However, the results from lineage tracing experiments that could prove the conversion of duct cells to  $\beta$ -cells have mostly been negative [14,15,16,17]. Multiple groups have tried to maintain human duct cells in long-term culture [10,18,19], but rapidly dividing vimentin-positive cells quickly overgrow adherent cultures of mixed exocrine cells [18,20]. In addition, most pancreatic duct cell culture protocols require the use of serum-containing medium, which is undesirable for research or therapeutic cell culture because serum is undefined, suffers from

high batch-to-batch variation and may contain dangerous contaminants that are problematic for transplantation applications [21,22]. Improved methods to separate exocrine cell populations and to culture them in defined optimized media are needed to enable studies of duct cell biology.

One reported method to obtain 93~97% pure CK19+ cell cultures isolated pancreatic cells expressing the carbohydrate antigen 19-9 (Ca19-9) [23]. However, the cell phenotypes obtained after 7 days of culture were not quantified and the Ca19-9 enriched cells expanded poorly [24]. Since vimentin-positive cells are the main competing population, an alternative approach would be to selectively remove this population. This negative cell sorting strategy would have the advantage of leaving the cells of interest free from surface antibodies and magnetic beads that may affect cell behaviour [25,26]. The *in vitro* differentiation potential of fibroblast-like cells expanded from adult human pancreatic tissue resembles the differentiation potential expected for mesenchymal stem cells, expressing markers including CD90 and capable of chondrogenic or osteogenic differentiation [20]. CD90.1-positive cells enriched from rat pancreatic tissue adopt a fibroblast-like phenotype in culture and express much lower levels of duct markers than CD90.1-depleted cells [27].

We present a novel method to obtain purified human CK19-positive cell cultures from mixed pancreatic exocrine tissue and to quantify their proliferation in a high-throughput assay. Depletion of CD90-expressing cells successfully eliminated most fibroblast-like cells from the cultures. High-throughput imaging of the CD90-depleted cultures in 96-well plates allowed the multifactorial testing of the effects of five reported duct mitogens on apoptosis, expansion and proliferation. This led to the development of a serum-free medium to replace the use of serum and provide defined culture conditions for pancreatic duct cell culture research.

## Methods

### Cell culture

Islet-depleted pancreatic cell aggregates from human donors (10 in total; age  $39 \pm 19$  years; body weight  $72 \pm 13$  kg) were kindly provided by Dr. Garth Warnock and Dr. Ziliang Ao at the Ike Barber Human Islet Transplant Laboratory (Vancouver, BC, Canada). Pancreata were obtained with the written informed consent of family members under the approval of the University of British Columbia Clinical Research Ethics Board. Cell clusters received on day 0 were washed twice in CMRL medium with 10% fetal bovine serum, 100 units/mL penicillin and 100  $\mu\text{g}/\text{mL}$  streptomycin (all from Invitrogen, Carlsbad, CA), referred to as CMRL+10% FBS medium. Clusters were then dispersed or seeded overnight in CMRL+10% FBS medium at 1  $\mu\text{L}$  packed cell volume (PCV)/ $\text{cm}^2$  (PCV tubes, Techno Plastic Product, Trasadingen, Switzerland) in tissue culture-treated flasks (Sarstedt, Nümbrecht, Germany) before magnetic-activated cell sorting (MACS) on day 1. Unsorted or sorted cells were seeded at  $1.25 \times 10^5$  cells/ $\text{cm}^2$  in 0.32 mL/ $\text{cm}^2$  CMRL+10% FBS medium in plates containing 0.32 mL/ $\text{cm}^2$  pre-incubated medium and cultured at 37°C, 5% CO<sub>2</sub> and 90% humidity. Live cells were enumerated by trypan blue exclusion using a Cedex cell counter (Roche Innovatis, Bielefeld, Germany). The unsorted and MACS-sorted cultures were maintained in CMRL+10% FBS medium for 8 days, with medium exchanges on days 2, 5 and 7. For serum-free assay development and screening, the cultures were shortened to 6 days with medium exchanges on days 2 and 5. The basal CMRL-0.1X ITS serum-free medium consisted of CMRL with 0.5 mg/L insulin+0.5 mg/L transferrin+0.5  $\mu\text{g}/\text{L}$  selenite (i.e. 0.1 times I-1884 from Sigma), 10 mM nicotinamide and 0.2% BSA (STEMCELL, BC, Canada). The test solutions contained 0.1%, 1% or 10% FBS (Invitrogen), or 50% pancreatic fibroblast-conditioned medium diluted in CMRL-0.1X ITS. The following recombinant human growth factors were also tested at 20 ng/mL unless otherwise mentioned: basic fibroblast growth factor (bFGF, STEMCELL), epidermal growth factor (EGF, STEMCELL), hepatocyte growth factor (HGF, Sigma), keratinocyte growth factor (KGF, Sigma), vascular endothelial growth factor (VEGF, Sigma). One h after the last medium exchange, 10  $\mu\text{M}$  of 5-Bromo-2'-deoxy-uridine was added (BrdU, Labelling and Detection Kit II, Roche, Basel, Switzerland) and incubated for 20 h prior to fixing, staining and Cellomics analysis.

### Conditioned medium

Passaged (P3 to P8) CD90-enriched pancreatic cells cultured in CMRL+10% FBS medium until reaching 90% confluency ( $\sim 6 \times 10^4$  cells/ $\text{cm}^2$ ) were treated with 10  $\mu\text{g}/\text{mL}$  mitomycin c (Sigma) for 1 h, washed 3 times and incubated for 24 h in CMRL-0.1X ITS, then filter-sterilized and stored at  $-80^\circ\text{C}$ .

### Cell dispersion

Cell clusters were washed twice with dispersion medium (1 mM EDTA from Invitrogen, 10 mM HEPES from Sigma and 0.5% bovine serum albumin from STEMCELL prepared in Ca<sup>2+</sup> and

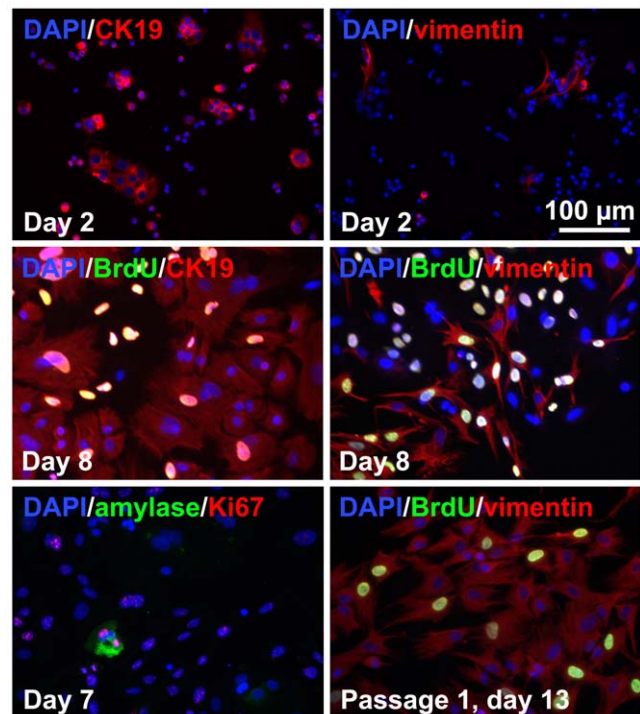

**Figure 1. Phenotype of dispersed unsorted islet-depleted pancreatic cells cultured in serum-containing medium.** On day 8, mixed cultures of CK19+ duct-like cells and vimentin+ fibroblast-like cells with very rare amylose+ cells are obtained. After a single passage, cultures consisted mainly of vimentin+ cells.

doi:10.1371/journal.pone.0033999.g001

Mg<sup>2+</sup>-free HBSS from Invitrogen), then re-suspended at 0.05 mL PCV/mL in dispersion medium and kept at 37°C for 7 min with 75 rpm agitation. Clusters were digested for 10 min at 37°C by adding 25  $\mu\text{g}/\text{mL}$  trypsin and 4  $\mu\text{g}/\text{mL}$  DNase (Sigma). After adding CMRL+10% FBS medium, the cells were triturated and filtered through a 40  $\mu\text{m}$  nylon sieve (BD Biosciences). The total cell yield based on PCV was  $43 \pm 7\%$ , providing  $168 \pm 39$  million live dispersed cells/mL PCV initial tissue clusters.

### Magnetic-activated cell sorting

Adherent cells from undispersed clusters were washed with MACS buffer consisting of Ca<sup>2+</sup> and Mg<sup>2+</sup>-free phosphate buffered saline (PBS) with 1% FBS, 2 mM EDTA, 100 units/mL penicillin and 100  $\mu\text{g}/\text{mL}$  streptomycin. Cells were trypsinized, triturated after adding CMRL+10% FBS medium and then filtered through a 40  $\mu\text{m}$  cell strainer (BD Biosciences), yielding  $0.17 \pm 0.05 \times 10^6$  cells/ $\text{cm}^2$  on day 1. The cells were then washed twice with MACS buffer and re-suspended at  $\leq 2 \times 10^7$  cells/mL in  $\geq 50$   $\mu\text{L}$  MACS buffer. An equal volume of primary antibody was added to obtain 1:100 mouse anti-Ca19-9 (#NCL-L-CA19-9, Leica Microsystems, Germany) or 1:500 mouse anti-CD90 (#555593, BD Pharmingen, CA). After incubating for 25 min on ice at 75 rpm agitation, the cells were washed twice with MACS buffer. Magnetic labeling was performed using microbead-labelled goat or rat anti-mouse IgG1 antibody (#130-048-402 or #130-047-102, Miltenyi Biotec, Germany). Cells were re-suspended at  $4 \times 10^6$  cells/mL and separated using the “possel” (for Ca19-9) or “depletes” (for CD90) program of an Automacs® (Miltenyi) cell separator. The total live cell yield from MACS was  $60 \pm 3\%$ .

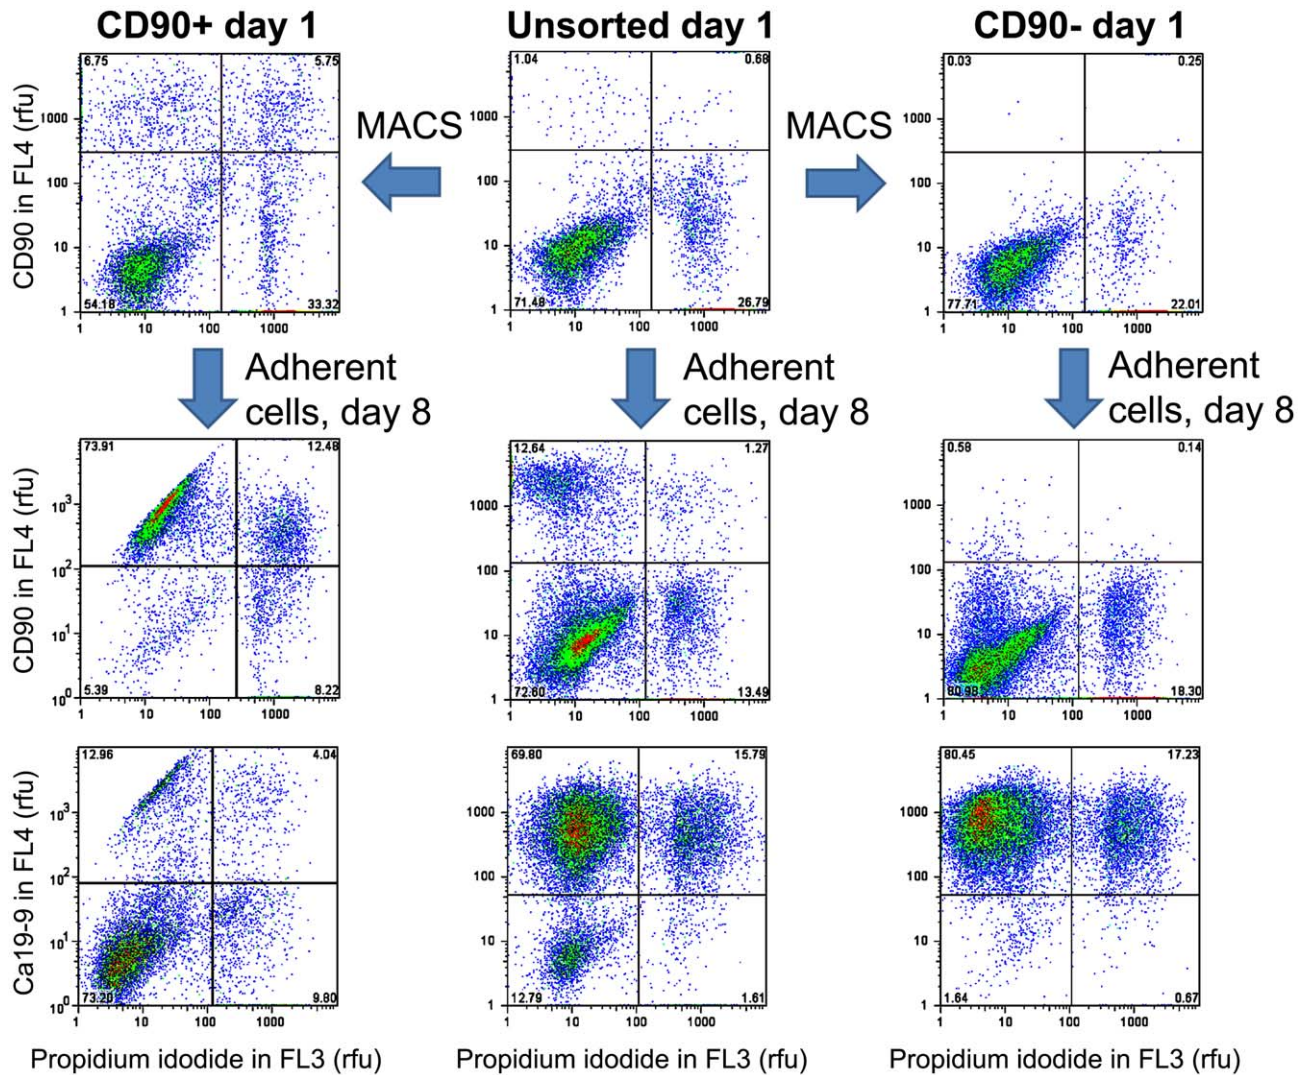

**Figure 2. Evolution of cell populations after CD90 magnetic-activated cell sorting assessed by FACS.**  
doi:10.1371/journal.pone.0033999.g002

### Flow cytometry

Adherent cells were washed with PBS, trypsinized, triturated after adding FACS buffer (PBS+10% FBS) and filtered through a 40  $\mu$ m strainer. Cells kept on ice were then washed twice with FACS buffer, distributed to obtain  $2.5 \times 10^5$  cells/sample, centrifuged and re-suspended in 50  $\mu$ L. Then, 50  $\mu$ L of primary antibody diluted in FACS buffer (same concentrations as for MACS) were added, followed by 25 min incubation at 75 rpm. The cells were washed twice, re-suspended in 50  $\mu$ L and 50  $\mu$ L of Alexa 647 labelled goat anti-mouse IgG (A21450, Invitrogen) were added to obtain a 1:200 dilution. After 15 min incubation in the dark at 75 rpm, 10  $\mu$ L of propidium iodide at 100  $\mu$ g/mL (Sigma, in PBS) was added. The cells were washed twice, re-suspended in 500  $\mu$ L FACS buffer and analyzed on a BD FACSCalibur flow cytometer. Data analysis including compensation was performed with Flowjo 7.2.5 software (Tree Star, Ashland, OR).

### Immunocytochemistry and Cellomics

Cell fixing and staining with BrdU was performed according to the BrdU kit instructions (Roche), except for diluting primary and secondary antibodies 1:20. For samples that did not require BrdU

labeling, the cells were fixed with Bouin's fixative for 15 min and stored in 70% ethanol. CK19 or Ki67 antigen retrieval was performed by microwaving 6 times for 5 s at 1000 W in 10 mM citrate (Sigma) at pH 6.0 and cells permeabilized by a 10 min incubation in 0.25% Triton X 100 (Sigma) dissolved in PBS. Unless otherwise mentioned, all subsequent incubations were at room temperature and 100 rpm agitation. All samples were then washed with PBS, incubated in blocking solution (Dakocytomation, Glostrup, Denmark) for 15 min and then stained overnight at 4°C with primary antibodies in Antibody Diluent (Dako). Primary antibodies were 1:200 guinea pig anti-human insulin (Dako A0564), 1:1000 rabbit anti-human amylase (Sigma A8273), 1:200 mouse anti-human CK19 (Dako M0888), 1:200 mouse anti-human vimentin (Dako M0725), 1:50 rabbit anti-human Ki67 (Santa Cruz Biotech sc-15402, Santa Cruz, CA) and/or 1:200 mouse anti-human Ki67 (BD Biosciences 556003). The next day, cells were washed with PBS and stained 1 h in the dark with secondary antibodies (Alexa 488 goat anti-guinea pig IgG, Alexa 488 or 568 goat anti-rabbit IgG and/or Alexa 568 goat anti-mouse IgG, all from Invitrogen) at 1:200 in Antibody Diluent. Samples were then washed, stained with 1  $\mu$ g/mL DAPI for

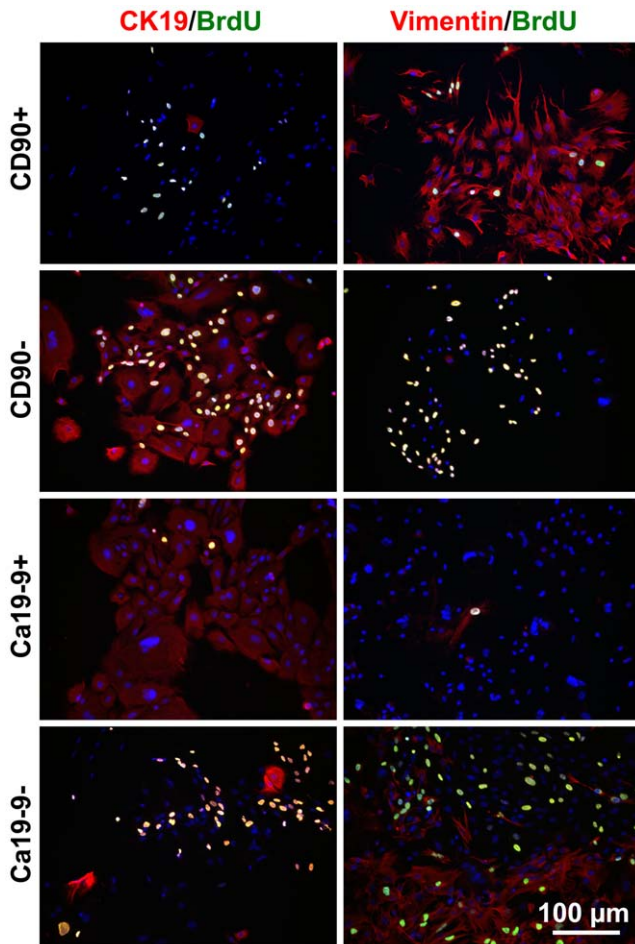

**Figure 3. Phenotype of MACS-sorted cultures.** The CD90-enriched or Ca19-9 depleted cell fractions generate cultures of spindle-shaped vimentin+ cells; while the CD90-depleted and Ca19-9 enriched fractions generate cobblestone-pattern CK19+ cells. Culture time: 8 days. doi:10.1371/journal.pone.0033999.g003

15 min, and washed again. The plates were imaged on a Celloomics ArrayScan VTI. Slides were mounted with Vectashield medium (Vector Labs, Burlingame, CA) and imaged on a Zeiss Axioplan 2 microscope (Carl Zeiss, Oberkochen, Germany), using ImageJ analysis software (NIH).

### Design of experiments and statistical analysis

Results represent the average values obtained from 3 to 5 pancreata  $\pm$  standard error of the mean. Two-way comparisons were based on Student's t-tests with p-values < 0.05 considered significant, with a paired t-test used in the case of the comparison between the CK19+ cell number and BrdU incorporation read-outs. For comparison between a basal response and responses normalized to the basal response, confidence intervals with  $\alpha$  levels of 0.05 were used. The main and interaction effects of bFGF, EGF, HGF, KGF and VEGF were quantified by a two-level (low level 0 ng/mL; high level 20 ng/mL) full factorial design with 8 centre points (10 ng/mL of all five factors). For each pancreas, these 40 conditions were repeated on three 96-well plates with different randomization on each plate. The results were analyzed with JMP 7.0 or 8.0 statistics software (SAS, Cary, NC). The growth factor concentrations  $C_i$  were transformed into scaled variables  $x_i = \frac{C_i - 10}{10}$ . The model was as follows:  $Y = \beta_0 + \beta_F x_F + \beta_E x_E + \dots + \beta_{EF} x_E x_F + \dots$  up to the fifth-

order interaction effect  $\beta_{EFHKV} x_E x_F x_H x_K x_V$ , where  $\beta_i$  values represent the fitted model parameters. The subscripts F, E, H, K, V represent the "i" factors bFGF, EGF, HGF, KGF and VEGF. The model was then reduced to exclude factors with p-values > 0.1.

## Results

### Cultures of human exocrine pancreatic tissue give rise to duct-like epithelial cells and fibroblast-like cells

The cell types in islet-depleted cell clusters and derived adherent cultures were assessed. The initial dispersed tissue (day 0) consisted of  $61 \pm 16\%$  amylase+ cells,  $6 \pm 3\%$  CK19+ cells,  $12 \pm 6\%$  vimentin+ cells and  $0.04 \pm 0.01\%$  insulin+ cells. The fraction of insulin+ cells remained < 1% throughout the culture period. After 2 days of adherent culture, the total adherent cell number was  $27 \pm 16\%$  of the cell number seeded, as expected for cultures containing significant numbers of human acinar exocrine cells [28]. Most CK19+ cells were in small clusters by day 2 (Figure 1), suggesting that these cells proliferated within 2 days, were incompletely dispersed or re-aggregated selectively. On the contrary, the vimentin+ cells were dispersed as single cells. At day 8, the cultures mainly consisted of duct-like cells in rounded cobblestone patterns surrounded by fibroblast-like spindle-shaped cells. The remaining amylase+ cells accounted for < 1% of the cells and appeared unhealthy. Both main populations were proliferative at day 7 ( $44 \pm 26\%$  BrdU+ cells among CK19+ cells;  $60 \pm 24\%$  BrdU+ cells among vimentin+ cells). After a single passage (day 13), the cultures consisted almost entirely of vimentin+ cells with rare CK19+ cells.

### Magnetic-activated CD90- cell sorting removes fibroblast-like cells

A negative cell selection strategy was developed to purify human pancreatic exocrine cell cultures by removing CD90-positive cells. After 7 days of adherent culture,  $34 \pm 20\%$  of dispersed unsorted islet-depleted pancreatic cells were labelled with CD90 antibodies (Figure 2), a proportion similar to that of the spindle-shaped fibroblast-like cells. In preliminary studies, CD90-depleted cells obtained by MACS sorting on day 7 had  $\sim 2$  fold higher CK19 mRNA and  $\sim 2.4$  fold lower vimentin mRNA compared to the CD90-enriched fraction (data not shown).

To remove fibroblast-like cells before they proliferate to become a significant fraction of the cultured cells, islet-depleted cell clusters were first plated, left to adhere overnight and sorted on day 1. Cell dispersion after overnight adhesion had the advantage of being less damaging ( $85 \pm 4\%$  cell viability after dispersion) than dispersion of clusters on day 0 ( $71 \pm 4\%$  viability), without any significant difference in the viable cell yield ( $166 \pm 72$  million cells/mL initial PCV). The cell phenotypes obtained after CD90 sorting on day 1 are shown in Figures 2 and 3 as well as in Table 1. Depletion reduced the fraction of CD90+ cells on day 1 from  $8 \pm 7\%$  to  $0.06 \pm 0.01\%$ . After 7 days of culture, the unsorted cells consisted of a  $\sim 40/60$  mixture of Ca19-9+ and CD90+ cells whereas the CD90-depleted cultures consisted of  $> 85\%$  Ca19-9+ cells (Figure 2). On day 8, the CD90-depleted cell cultures consisted mainly of CK19+ cells growing in cobblestone patterns typical of epithelial cells, while the CD90-enriched cultures consisted mainly of spindle-shaped fibroblast-like vimentin+ cells (Figure 3). Compared to unsorted tissue, CD90 depletion doubled the fraction of CK19+ cells on day 8, similar to the CK19+ fraction obtained by enrichment of cells expressing the Ca19-9 duct surface marker. Although a higher proportion of amylase+ cells were seeded by CD90 depletion than by Ca19-9-enrichment, there were no significant differences in the cell phenotypes obtained on day 8 (Figure 3 and Table 1). When enriched amylase+ cells obtained by

**Table 1.** Fractions of cells obtained before and after sorting on day 1.

| Cell population | Day seeded | Day analyzed | % positive cells by immunocytochemistry |                    |                    | % positive cells by FACS |                    |
|-----------------|------------|--------------|-----------------------------------------|--------------------|--------------------|--------------------------|--------------------|
|                 |            |              | Amylase                                 | CK19               | Vimentin           | CD90                     | Ca19-9             |
| Unsorted        | 0          | 0            | 61±16 <sup>b</sup>                      | 6±3                | 12±6               | N/A                      | N/A                |
| Unsorted        | 0          | 1            | 47±17                                   | 22±6 <sup>a</sup>  | 11±4 <sup>a</sup>  | 8±7 <sup>a</sup>         | 54±16              |
| CD90-           | 0          | 1            | 42±10                                   | 18±6 <sup>a</sup>  | 8±2 <sup>a</sup>   | 0.06±0.01 <sup>a</sup>   | N/A                |
| CD90+           | 0          | 1            | 19±5                                    | 12±6 <sup>a</sup>  | 42±18 <sup>a</sup> | 26±10 <sup>a</sup>       | N/A                |
| Ca19-9+         | 0          | 1            | 16±8                                    | 51±21 <sup>a</sup> | 2±2 <sup>a</sup>   | N/A                      | 96±2               |
| Ca19-9-         | 0          | 1            | 72±14                                   | 5±2 <sup>a</sup>   | 24±9 <sup>a</sup>  | N/A                      | 14±13              |
| Unsorted        | 0          | 8            | 0.6 <sup>c</sup>                        | 32±7               | 18±11              | 48±18                    | 46±20              |
| Unsorted        | 1          | 8            | 0.5 <sup>c</sup>                        | 36±10              | 21±5               | 27±9 <sup>a</sup>        | 60±11 <sup>a</sup> |
| CD90-           | 1          | 8            | 2.3 <sup>c</sup>                        | 59±4               | 10±2               | 0.7±0.4 <sup>a</sup>     | 79±8 <sup>a</sup>  |
| CD90+           | 1          | 8            | 7.4 <sup>c</sup>                        | 16±3               | 54±21              | 84±3                     | 14±1 <sup>b</sup>  |
| Ca19-9+         | 1          | 8            | 0.6 <sup>c</sup>                        | 55±10              | 7±2                | 0.7±0.2 <sup>b</sup>     | 93±4 <sup>b</sup>  |
| Ca19-9-         | 1          | 8            | 0.5 <sup>c</sup>                        | 25±10              | 48±18              | 67±9 <sup>b</sup>        | 4±1 <sup>b</sup>   |

Note: unless otherwise indicated, the number of replicates is N=3 pancreata.

<sup>a</sup>Number of replicate pancreata = 4.

<sup>b</sup>Number of replicate pancreata = 2.

<sup>c</sup>Number of replicate pancreata = 1.

N/A = non-available.

doi:10.1371/journal.pone.0033999.t001

CD90/Ca19-9+ cell co-depletion were seeded in one experiment, the number of viable cells enumerated on day 9 was <1% of the number of CK19+ cells in CD90-depleted cultures (data not shown), indicating that most amylase+ cells do not persist until day 8 in adherent cultures.

### Development of a screening platform to optimize duct cell expansion

Next we sought to identify factors capable of promoting human CK19+ cell expansion and to develop a serum-free medium for CK19+ cell culture. Cells in the negative controls were cultured in serum-free basal medium, while FBS or the reported duct mitogen EGF were added to the positive controls. Two responses after culture were quantified: the number of CK19+ cells (Figure 4A), or the BrdU incorporation by CK19+ cells (Figure 4B). The cell expansion rate varied between pancreata. To render the results between pancreata more comparable and to avoid saturation of the CK19+ cell number read-out, all cultures were ended when cells in the 10% FBS control reached confluency. The amplitude of the response to FBS was significantly higher ( $p = 0.005$ , paired t-test for the 0.1%, 1% and 10% FBS responses) for the BrdU response than for the CK19+ cell number. In addition, contrary to the CK19+ cell number, BrdU incorporation was consistently increased in the 10% FBS positive control condition for all 6 pancreata, even for the 2 pancreata where confluency (~5000 cells/well) was reached by day 6. Another consideration addressed in these experiments was whether soluble factors secreted by the fibroblast-like CD90+ cells affected CK19+ cell expansion. The addition of 50% conditioned medium from passaged CD90-enriched cells tended to increase both the number and the BrdU incorporation of CK19+ cells. This complicated data interpretation especially for unsorted cultures because the CK19+ cell results could be indirectly influenced by factors produced by the large fraction of vimentin+ cells in these cultures (Figure 1). Based on these observations, screening experiments aiming to maximize CK19+ cell expansion were performed on CD90-depleted cell

populations, using BrdU incorporation by CK19+ cells between days 5 and 6 as the measured response.

### Multifactorial screening to optimize CK19+ cell expansion

The methodology developed was then applied to test the full factorial effects of five growth factors: bFGF, EGF, HGF, KGF and VEGF, using a total of 120 cultures and 3 pancreata to systematically determine the main and interaction effects of these factors. In this case, the culture time was kept constant at 6 days to simplify experimental planning and since none of the previous cultures (Figure 4) reached confluency before day 6. The high level growth factor concentrations selected for the factorial experimental design (20 ng/mL for each growth factor) were based on growth factor concentrations reported to increase duct cell expansion (Table 2.1 in reference [29]). Figure 5A shows the values of the scaled model parameters  $\beta_i$  obtained by least squares fitting. The raw data of the full factorial experiment, including other read-outs such as the fraction number of CK19+ or vimentin+ cells is provided as supporting information in JMP (Dataset S1) and comma-separated values (Dataset S2) formats. Statistical analysis software (e.g. JMP) can be used to determine the read-outs predicted for various growth factor combinations and concentrations. The model described by Figure 5A was then reduced to include only the significant ( $p < 0.05$  in Figure 5A) parameters. No significant lack-of-fit was detected, indicating that the reduced model predicted the data within the experimental error, as can be seen in Figure 5B. The reduced model equation using scaled growth factor concentrations was:

$$Y = 2.18 + 0.33x_F + 0.32x_E + 0.24x_H + 0.23x_K + 0.28x_{E \times V} + 0.20x_{F \times H \times K \times V} \quad (1)$$

where Y represents the fold increase in BrdU incorporation by CK19+ cells relative to the read-out in the presence of basal medium and  $x_i$  are the growth factor concentrations scaled between -1 (0 ng/mL) and 1 (20 ng/mL). In this equation and

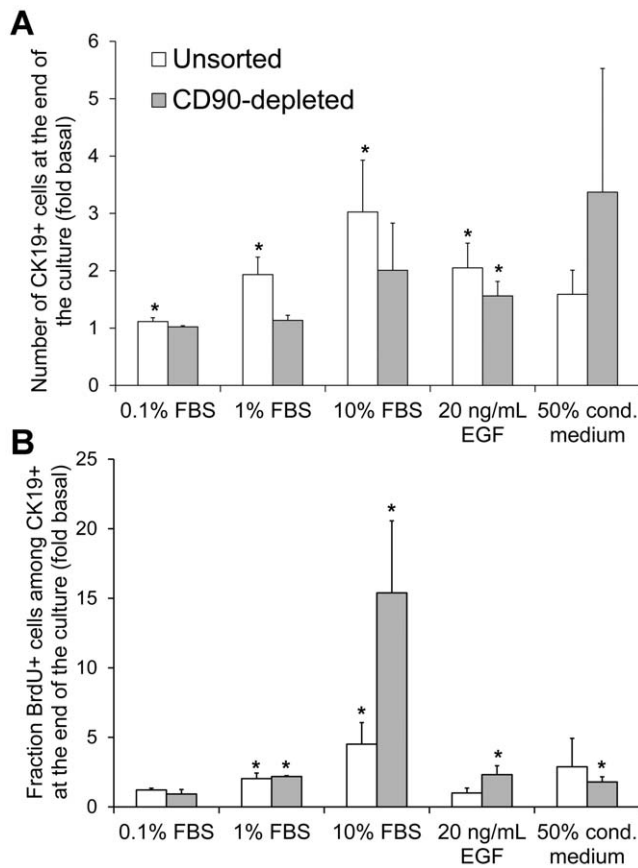

**Figure 4. Validation of a screening platform to identify CK19+ cell mitogens.** A) Number of CK19+ cells at the end of the culture normalized to the number obtained in basal serum-free medium culture. B) Fraction of CK19+ cells that incorporated BrdU during the last day of culture, normalized to BrdU incorporation in basal medium culture. Unsorted cells were seeded on day 0 while CD90-depleted cells were sorted and seeded on day 1. The data were pooled from cultures ending on day 8 (N=5 pancreata) or day 6 (N=3 pancreata) and normalized for each pancreas prior to calculating averages and errors. The non-normalized results obtained at the end of the cultures in basal medium were as follows: the unsorted populations contained  $0.05 \pm 0.02 \times 10^5$  CK19+ cells/cm<sup>2</sup> of which  $6 \pm 3\%$  were BrdU+; the CD90-depleted populations contained  $0.07 \pm 0.02 \times 10^5$  CK19+ cells/cm<sup>2</sup> of which  $1.0 \pm 0.6\%$  were BrdU+. \* $p < 0.05$  compared to basal medium. doi:10.1371/journal.pone.0033999.g004

from the scaled parameter estimates of the full factorial model (Figure 5A), it can be seen that bFGF, EGF, HGF and KGF each exerted significant positive main effects on CK19+ cell BrdU incorporation. Two significant interaction effects were also identified between EGF and VEGF, as well as bFGF, HGF, KGF and VEGF, indicating that in these combinations VEGF addition did have a positive effect. Conversely, a significant negative effect of VEGF would be expected in the absence of the other factors in these combinations (i.e. adding VEGF without also adding EGF or bFGF, HGF and KGF). Figure 5B compares the reduced model prediction to the measured fold increases in CK19+ cell BrdU incorporation for all growth factor combinations. Both the raw data and the model indicate that the combination of factors that promoted the highest CK19+ cell proliferation was the addition of all five factors (at 20 ng/mL each), but with >70% of this effect achieved by the FH (bFGF and

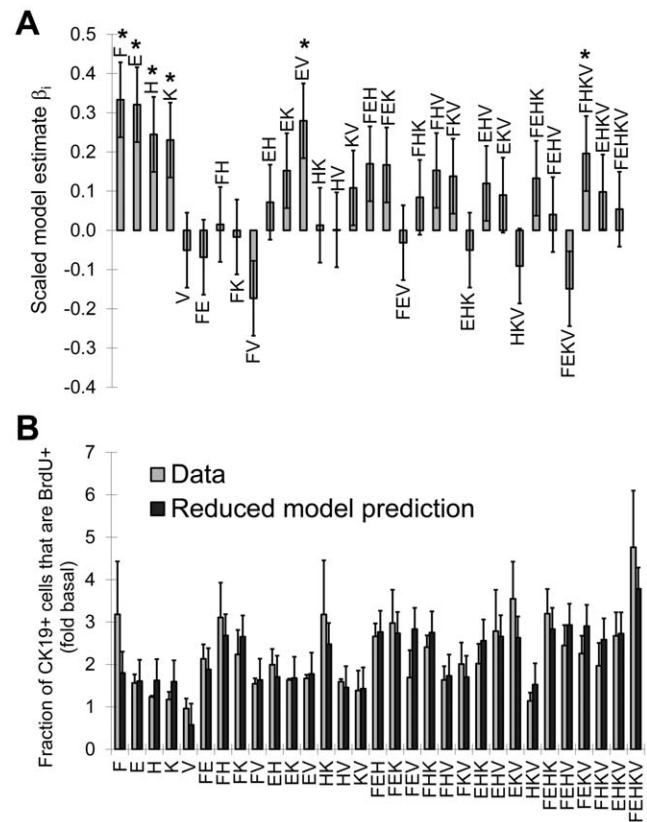

**Figure 5. The 2<sup>5</sup> full factorial effects of reported duct mitogens on CK19+ cell proliferation.** The mitogens tested were bFGF (F), EGF (E), HGF (H), KGF (K) and VEGF (V) and the response measured was the fraction of BrdU+ cells among CD90-depleted CK19+ cells. A) Scaled parameter estimates of the full factorial model (\* $p < 0.05$ ). The “pancreas” effect, considered as a non-interacting independent variable, was non-significant and is not shown. Here, F, E, H, K and V represent their respective effects ( $\beta_i$ ) in the factorial model, divided by the  $\beta_0$  intercept. B) Comparison between the experimental data and the reduced factorial model prediction for each combination. Here, F, E, H, K and V represent the addition of 20 ng/mL of each growth factor (e.g. the HK combination represents the addition of 20 ng/mL HGF and 20 ng/mL KGF without any other growth factors added). The values of the model predictions represent the value calculated from Equation 1  $\pm$  standard error of the model. The data were generated from N=3 pancreata cultured for 6 days. The dataset used to generate this figure is provided as supporting information in JMP (Dataset S1) and comma-separated values (Dataset S2) formats. doi:10.1371/journal.pone.0033999.g005

HGF) or FK (bFGF and KGF) combinations. It should be noted that EGF and HGF were also found to have significant negative effect on the %CK19+ cells for each pancreas, respectively leading to  $2 \pm 1\%$  and  $3 \pm 1\%$  decrease in the  $69 \pm 11\%$  fraction of CK19+ cells observed if no growth factors were added (N=3 pancreata). The effect of the bFGF, EGF, HGF and KGF (FEHK, at 20 ng/mL each) growth factor combination on CK19+ cell expansion was further examined in a time-course experiment with replicate cultures of cells from one pancreas. Figure 6A shows that the FEHK growth factor cocktail did significantly increase net CK19+ cell numbers compared to the basal medium and yielded CK19+ cell numbers equal or superior to those obtained with 10% FBS. The cultures obtained in the FEHK serum-free conditions retained the cobblestone pattern morphology typical of pancreatic duct cell cultures (Figure 6B).

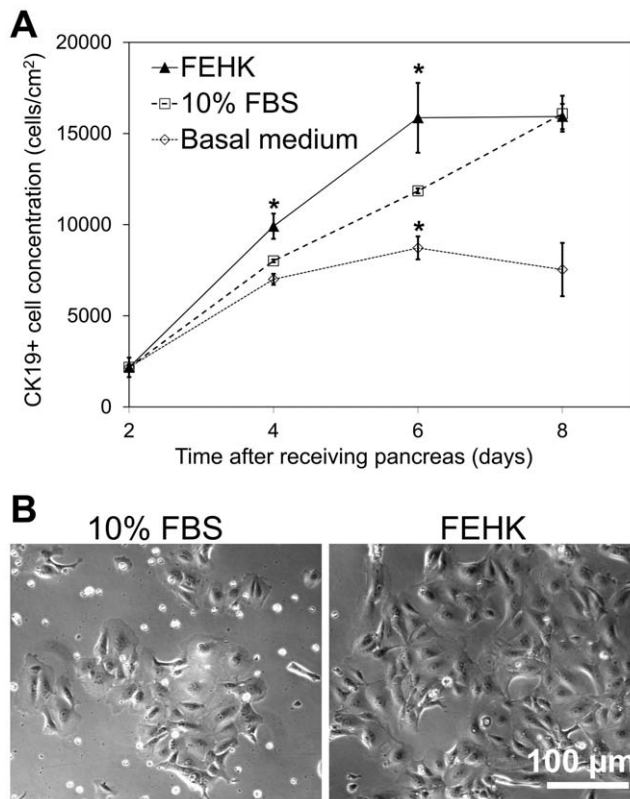

**Figure 6. CK19+ cell expansion in medium containing bFGF, EGF, HGF and KGF compared to control media.** A) Growth curve based on the number of CK19+ cells enumerated at different time points in the presence of 20 ng/mL each of bFGF, EGF, HGF and KGF or control media (\* $p < 0.05$  for two-way comparisons with the 10% FBS condition). B) Phase contrast images of the cultures taken on day 6. N = 1 pancreas with 6 replicate cultures. doi:10.1371/journal.pone.0033999.g006

## Discussion

The study and medical use of duct-like cells derived from the pancreatic tissues discarded during islet transplantation is hampered by fibroblast-like cell overgrowth and the need for an optimized defined serum-free medium for duct-like cell expansion. We present a novel method to deplete fibroblast-like cells from pancreatic tissue using CD90-based selection, as well as a serum-free high content screening platform to identify pancreatic duct mitogens.

Human duct-like cells can reportedly be maintained in culture for up to 5 weeks with fibroblast overgrowth avoided by selective cell scraping [30]. However, this would normally not be practical for larger experiments and requires human pancreatic duct dissection rather than the simpler use of the tissue discarded after islet transplantation. Pre-plating reduces but does not sufficiently eliminate contaminating fibroblast-like cells [10]. Treatment with G418 yields purified endothelial cell cultures [31], but non-specifically affects all cycling cells. Fluorescence or magnetic-activated cell sorting of CA19-9 expressing cells generates purified duct cell cultures without contribution from acinar cells [23]. However, for studies related to diabetes cellular therapy or pancreatic cancer research, the CK19+/CA19-9+ cells arising from acinoductal transdifferentiation are of interest since they may generate insulin+ cells [32,33] or cancer precursors [34]. In our work, CD90 was used to deplete fibroblast-like cells [20] but not

acinar cells from islet-depleted pancreatic cell clusters. After one week, magnetically sorted CD90+ cells yielded fibroblast-like vimentin+ cells, while the reseeded CD90- cells yielded CK19+ cells with epithelial morphology (Figure 3) that contained virtually no CD90+ cells.

The CD90 depletion strategy was compared to the conventional CA19-9+ cell enrichment. On day 8, there was no significant difference between the number or the fraction of CK19+ cells obtained by CD90 depletion and CA19-9 enrichment. Yet, the initial CK19+ cell number seeded was 2.5 fold lower for the CD90- sorted cells compared to the CA19-9+ sorted cells due to the presence of acinar cells in the CD90- sorted population. It is possible that molecules released by lysing amylase+ cells [35] or contaminating endocrine cells [36] increased the CK19+ cell proliferation in the CD90-depleted cultures by mechanisms similar to those occurring after pancreas injury [37], or that the presence of antibodies on the surface of the CA19-9+ cells decreased their proliferation or survival. It has been suggested that acinar cells can also give rise to CK19+ cells in pancreatic cultures [33,34,38,39]. However, we enumerated very few viable cells when we cultured purified acinar cells obtained by CD90 and CA19-9 co-depletion. Similar to other reports of selective human pancreatic acinar cell death [28,40], we did not observe any amylase+ cells co-stained with CK19, and the amylase+ cells appeared apoptotic based on their condensed nuclei [41]. These observations suggest that the CK19+ cells in the CD90-depleted cultures mainly arose from duct cells rather than transdifferentiated acinar cells.

A Cellomics-based imaging method was used to screen CK19+ cell mitogens and develop a serum-free medium adapted to these cells. CD90-depleted cells were used to avoid measuring indirect effects exerted by vimentin+ cells on the CK19+ cells. Factorial design [42,43,44,45] increased the statistical power of experiments and reduced the number of runs required to elucidate factor interaction effects compared to performing a series of two-way comparisons [46]. The positive main effects of bFGF, EGF, HGF and KGF observed are consistent with their reported effects on normal [47,48,49,50,51] and neoplastic [52] ductal cells. Pancreatic knock-down of the bFGF [53] or the EGF receptor impairs embryonic ductal growth and branching morphogenesis. EGF treatment increases the proliferation of embryonic pancreatic epithelial cells *in vitro* [54] and leads to pancreatic duct hyperplasia when administered to adult pigs [55]. The secretion of KGF [56] [57,58] and HGF [59] [60] by the embryonic pancreatic mesenchyme induces the expansion of early pancreatic epithelial progenitors [61]. The effect of VEGF was less clear, decreasing CK19+ cell proliferation by ~70% when added alone and reducing the mitogenic effects of other factors in several 3-factor combinations, and yet increasing CK19+ cell proliferation when all factors were added together. VEGF has been shown to increase the proliferation of fetal [62] and adult [63] rat pancreatic endothelial cells *in vitro*, but did not have a significant effect on adult human islet-depleted tissue in suspension cultures [28]. The interaction effects involving VEGF that were uncovered by the factorial experiment could explain the disparity between the reported *in vitro* effects of VEGF on duct cells (i.e. because they depend on the other factors present in the culture medium). Some confusion over the effects of VEGF on duct cells *in vitro* may also arise from indirect effects of VEGF on mesenchymal cells [64], further underlining the importance of cell sorting strategies to assess the direct effects on the population of interest.

The methods developed in this work can be applied to a variety of studies involving primary human pancreatic and other tissues. In particular, CD90 depletion provides a useful tool to resolve pancreatic cell populations. For example, CA19-9 and CD90 co-

depletion could be used to obtain purified acinar cells from islet-depleted tissue. CD90-depletion could also be useful to eliminate fibroblast-like cells from dispersed human islets by removing CD90 and C19-9 expressing cells in a single step prior to NCAM+ sorting [65]. The high content duct-mitogen screening platform could be used to further optimize pancreatic CK19+ cell culture conditions, such as for testing other growth factors, basal media, alternative medium additives or culture surfaces. The factors in CD90-cell conditioned medium that cause an increased proliferation of the CK19+ cells could be identified by fractionation and mass spectrometry. Also, the bFGF, EGF, HGF and KGF-supplemented serum-free medium or other promising combinations such as bFGF and HGF or bFGF and KGF could be used in protocols requiring the serum-free expansion of pancreatic CK19+ cells. The optimal concentrations of these growth factors could be investigated by more complex multidimensional dose response studies, for example using central composite experimental design [42]. The CD90-depleted cell culture platform could be used in a variety of high content screening studies, such as to identify molecules that hinder the proliferation of pancreatic cancer cells, but not normal duct cells.

In conclusion, we describe a novel CD90 magnetic-activated cell depletion strategy to generate purified CK19+ cell cultures from primary human islet-depleted pancreatic tissue. Multifactorial high content screening of the bFGF, EGF, HGF, KGF and VEGF effects uncovered significant interactions between these factors. The growth factor combination that maximized the expansion of CK19+ cells in serum-free medium included the addition of all five factors (at 20 ng/mL concentration for each factor), whereas the combination of bFGF and HGF, or the combination of bFGF and KGF achieved ~70% of the maximum effect. Several areas of diabetes and pancreatic cancer research could benefit from these methods to obtain purified CK19+

pancreatic cells in serum-free cultures amenable to high content screening.

## Supporting Information

**Dataset S1 Dataset used to compute the 2<sup>5</sup> full factorial effects of reported duct mitogens on CK19+ cell proliferation (Figure 5).** This dataset provides the cell number, the fraction of cells expressing CK19, the fraction of cells that did not express vimentin, as well as the BrdU incorporation by the CK19+ or vimentin- cells. The data are also provided as values normalized to the read-out measured in basal medium (- - - - condition) for each pancreas. Each read-out is provided for 40 factorial conditions, tested on the cells from 3 different pancreata. Each value provided corresponds to the average result measured for 3 replicate cultures. All cell numbers are provided for a surface area of 0.176 cm<sup>2</sup> (i.e. 16 images acquired at 10× magnification on the Cellomics apparatus).  
(JMP)

**Dataset S2 Dataset S1 in comma-separated values format.**  
(TXT)

## Acknowledgments

We thank Dr. Garth Warnock, Dr. Timothy Kieffer and Dr. Marta Szabat for useful discussions, Roger Kiang for technical assistance, as well as Dr. Ziliang Ao and the Ike Barber Human Islet Transplant Laboratory for providing the exocrine tissue.

## Author Contributions

Conceived and designed the experiments: CAH JP. Performed the experiments: CAH. Analyzed the data: CAH JJ JP. Contributed reagents/materials/analysis tools: JJ JP. Wrote the paper: CAH JJ JP.

## References

- Carter JD, Dula SB, Corbin KL, Wu R, Nunemaker CS (2009) A practical guide to rodent islet isolation and assessment. *Biol Proced Online* 11: 3–31.
- Shapiro AM, Lakey JR, Ryan EA, Korbutt GS, Toth E, et al. (2000) Islet transplantation in seven patients with type 1 diabetes mellitus using a glucocorticoid-free immunosuppressive regimen. *N Engl J Med* 343: 230–238.
- Ricordi C, Lacy PE, Finke EH, Olack BJ, Scharp DW (1988) Automated method for isolation of human pancreatic islets. *Diabetes* 37: 413–420.
- Reichert M, Rustgi AK (2011) Pancreatic ductal cells in development, regeneration, and neoplasia. *J Clin Invest* 121: 4572–4578.
- Adsay NV, Basturk O, Cheng JD, Andea AA (2005) Ductal neoplasia of the pancreas: nosologic, clinicopathologic, and biologic aspects. *Semin Radiat Oncol* 15: 254–264.
- Butler AE, Galasso R, Matveyenko A, Rizza RA, Dry S, et al. (2010) Pancreatic duct replication is increased with obesity and type 2 diabetes in humans. *Diabetologia* 53: 21–26.
- Rovira M, Scott SG, Liss AS, Jensen J, Thayer SP, et al. (2010) Isolation and characterization of centroacinar/terminal ductal progenitor cells in adult mouse pancreas. *Proc Natl Acad Sci U S A* 107: 75–80.
- Kikugawa R, Katsuta H, Akashi T, Yatoh S, Weir GC, et al. (2009) Differentiation of COPAS-sorted non-endocrine pancreatic cells into insulin-positive cells in the mouse. *Diabetologia* 52: 645–652.
- Hao E, Tyrberg B, Itkin-Ansari P, Lakey JR, Geron I, et al. (2006) Beta-cell differentiation from nonendocrine epithelial cells of the adult human pancreas. *Nat Med* 12: 310–316.
- Bonner-Weir S, Tanja M, Weir GC, Tatarkevich K, Song KH, et al. (2000) In vitro cultivation of human islets from expanded ductal tissue. *Proc Natl Acad Sci U S A* 97: 7999–8004.
- Ramiya VK, Maraist M, Arfors KE, Schatz DA, Peck AB, et al. (2000) Reversal of insulin-dependent diabetes using islets generated in vitro from pancreatic stem cells. *Nat Med* 6: 278–282.
- Xu XB, D'Hoker J, Stange G, Bonne S, De Leu N, et al. (2008) beta cells can be generated from endogenous progenitors in injured adult mouse pancreas. *Cell* 132: 197–207.
- Bonner-Weir S, Baxter LA, Schuppin GT, Smith FE (1993) A second pathway for regeneration of adult exocrine and endocrine pancreas. A possible recapitulation of embryonic development. *Diabetes* 42: 1715–1720.
- Dor Y, Brown J, Martinez OI, Melton DA (2004) Adult pancreatic beta-cells are formed by self-duplication rather than stem-cell differentiation. *Nature* 429: 41–46.
- Solar M, Cardalda C, Houbracken I, Martin M, Maestro MA, et al. (2009) Pancreatic exocrine duct cells give rise to insulin-producing beta cells during embryogenesis but not after birth. *Dev Cell* 17: 849–860.
- Teta M, Rankin MM, Long SY, Stein GM, Kushner JA (2007) Growth and regeneration of adult beta cells does not involve specialized progenitors. *Dev Cell* 12: 817–826.
- Kopp JL, Dubois CL, Hao E, Thorel F, Herrera PL, et al. (2011) Progenitor cell domains in the developing and adult pancreas. *Cell Cycle* 10: 1921–1927.
- Gao R, Ustinov J, Pulkkinen MA, Lundin K, Korsgren O, et al. (2003) Characterization of endocrine progenitor cells and critical factors for their differentiation in human adult pancreatic cell culture. *Diabetes* 52: 2007–2015.
- Todorov I, Omori K, Pascual M, Rawson J, Nair I, et al. (2006) Generation of human islets through expansion and differentiation of non-islet pancreatic cells discarded (pancreatic discard) after islet isolation. *Pancreas* 32: 130–138.
- Seeberger KL, Dufour JM, Shapiro AM, Lakey JR, Rajotte RV, et al. (2006) Expansion of mesenchymal stem cells from human pancreatic ductal epithelium. *Lab Invest* 86: 141–153.
- van der Valk J, Brunner D, De Smet K, Fex Svenningsen A, Honegger P, et al. (2010) Optimization of chemically defined cell culture media—replacing fetal bovine serum in mammalian in vitro methods. *Toxicol In Vitro* 24: 1053–1063.
- Gstraunthaler G (2003) Alternatives to the use of fetal bovine serum: serum-free cell culture. *ALTEX* 20: 275–281.
- Gmyr V, Belaich S, Muharram G, Lukowiak B, Vandewalle B, et al. (2004) Rapid purification of human ductal cells from human pancreatic fractions with surface antibody CA19-9. *Biochem Biophys Res Commun* 320: 27–33.
- Yatoh S, Dodge R, Akashi T, Omer A, Sharma A, et al. (2007) Differentiation of affinity-purified human pancreatic duct cells to beta-cells. *Diabetes* 56: 1802–1809.
- Pisanic TR II, Blackwell JD, Shubayev VI, Finones RR, Jin S (2007) Nanotoxicity of iron oxide nanoparticle internalization in growing neurons. *Biomaterials* 28: 2572–2581.
- Berry CC, Wells S, Charles S, Aitchison G, Curtis AS (2004) Cell response to dextran-derivatised iron oxide nanoparticles post internalisation. *Biomaterials* 25: 5405–5413.



27. Stevenson KS, McGlynn L, Hodge M, McLinden H, George WD, et al. (2009) Isolation, characterization, and differentiation of thyl.1-sorted pancreatic adult progenitor cell populations. *Stem Cells Dev* 18: 1389–1398.
28. Klein T, Heremans Y, Heimberg H, Pipeleers D, Madsen OD, et al. (2009) Investigation and characterization of the duct cell-enriching process during serum-free suspension and monolayer culture using the human exocrine pancreas fraction. *Pancreas* 38: 36–48.
29. Luu M (2004) Process Development for the Production of Pancreatic Islet Equivalents [Master's]. Vancouver: University of British Columbia.
30. Trautmann B, Schlitt HJ, Hahn EG, Lohr M (1993) Isolation, culture, and characterization of human pancreatic duct cells. *Pancreas* 8: 248–254.
31. Zhao M, Amiel SA, Christie MR, Rela M, Heaton N, et al. (2005) Insulin-producing cells derived from human pancreatic non-endocrine cell cultures reverse streptozotocin-induced hyperglycaemia in mice. *Diabetologia* 48: 2051–2061.
32. Okuno M, Minami K, Okumachi A, Miyawaki K, Yokoi N, et al. (2007) Generation of insulin-secreting cells from pancreatic acinar cells of animal models of type 1 diabetes. *Am J Physiol Endocrinol Metab* 292: E158–165.
33. Minami K, Okuno M, Miyawaki K, Okumachi A, Ishizaki K, et al. (2005) Lineage tracing and characterization of insulin-secreting cells generated from adult pancreatic acinar cells. *Proc Natl Acad Sci U S A* 102: 15116–15121.
34. Means AL, Meszoely IM, Suzuki K, Miyamoto Y, Rustgi AK, et al. (2005) Pancreatic epithelial plasticity mediated by acinar cell transdifferentiation and generation of nestin-positive intermediates. *Development* 132: 3767–3776.
35. Nguyen TD, Moody MW, Steinhoff M, Okolo C, Koh DS, et al. (1999) Trypsin activates pancreatic duct epithelial cell ion channels through proteinase-activated receptor-2. *J Clin Invest* 103: 261–269.
36. Gao R, Ustinov J, Korsgren O, Otonkoski T (2005) In vitro neogenesis of human islets reflects the plasticity of differentiated human pancreatic cells. *Diabetologia* 48: 2296–2304.
37. Sakaguchi Y, Inaba M, Kusafuka K, Okazaki K, Ikehara S (2006) Establishment of animal models for three types of pancreatitis and analyses of regeneration mechanisms. *Pancreas* 33: 371–381.
38. Rooman I, Heremans Y, Heimberg H, Bouwens L (2000) Modulation of rat pancreatic acinoductal transdifferentiation and expression of PDX-1 in vitro. *Diabetologia* 43: 907–914.
39. Houbracken I, de Waele E, Lardon J, Ling Z, Heimberg H, et al. (2011) Lineage tracing evidence for transdifferentiation of acinar to duct cells and plasticity of human pancreas. *Gastroenterology* 141: 731–741, 741e731–734.
40. Street C (2004) Enriched human pancreatic ductal cultures obtained from selective death of acinar cells expressing Pancreatic and Duodenal Homeobox gene-1 in an age-dependent manner. Not in press yet.
41. Wyllie AH, Morris RG, Smith AL, Dunlop D (1984) Chromatin cleavage in apoptosis: association with condensed chromatin morphology and dependence on macromolecular synthesis. *J Pathol* 142: 67–77.
42. Audet J, Miller CL, Eaves CJ, Piret JM (2002) Common and distinct features of cytokine effects on hematopoietic stem and progenitor cells revealed by dose-response surface analysis. *Biotechnol Bioeng* 80: 393–404.
43. Szabat M, Johnson JD, Piret JM (2010) Reciprocal modulation of adult beta cell maturity by activin A and follistatin. *Diabetologia*.
44. Fan X, Liu T, Liu Y, Ma X, Cui Z (2009) Optimization of primary culture condition for mesenchymal stem cells derived from umbilical cord blood with factorial design. *Biotechnol Prog* 25: 499–507.
45. Chen TW, Yao CL, Chu IM, Chuang TL, Hsieh TB, et al. (2009) Large generation of megakaryocytes from serum-free expanded human CD34+ cells. *Biochem Biophys Res Commun* 378: 112–117.
46. Yang F, Mei Y, Langer R, Anderson DG (2009) High throughput optimization of stem cell microenvironments. *Comb Chem High Throughput Screen* 12: 554–561.
47. Ogneva V, Martinova Y (2002) The effect of in vitro fibroblast growth factors on cell proliferation in pancreas from normal and streptozotocin-treated rats. *Diabetes Res Clin Pract* 57: 11–16.
48. Inchovska M, Ogneva V, Martinova Y (2006) Role of FGF1, FGF2 and FGF7 in the development of the pancreas from control and streptozotocin-treated hamsters. *Cell Prolif* 39: 537–550.
49. Rescan C, Le Bras S, Lefebvre VH, Frandsen U, Klein T, et al. (2005) EGF-induced proliferation of adult human pancreatic duct cells is mediated by the MEK/ERK cascade. *Lab Invest* 85: 65–74.
50. Vila MR, Nakamura T, Real FX (1995) Hepatocyte growth factor is a potent mitogen for normal human pancreas cells in vitro. *Lab Invest* 73: 409–418.
51. Yi ES, Yin S, Harclerode DL, Bedoya A, Bikhazi NB, et al. (1994) Keratinocyte growth factor induces pancreatic ductal epithelial proliferation. *Am J Pathol* 145: 80–85.
52. Hezel AF, Kimmelman AC, Stanger BZ, Bardeesy N, Depinho RA (2006) Genetics and biology of pancreatic ductal adenocarcinoma. *Genes Dev* 20: 1218–1249.
53. Pulkkinen MA, Spencer-Dene B, Dickson C, Otonkoski T (2003) The IIIb isoform of fibroblast growth factor receptor 2 is required for proper growth and branching of pancreatic ductal epithelium but not for differentiation of exocrine or endocrine cells. *Mechanisms of Development* 120: 167–175.
54. Miettinen P, Ormio P, Hakonen E, Banerjee M, Otonkoski T (2008) EGF receptor in pancreatic beta-cell mass regulation. *Biochem Soc Trans* 36: 280–285.
55. Vinter-Jensen L, Juhl CO, Teglbjaerg PS, Poulsen SS, Dajani EZ, et al. (1997) Systemic treatment with epidermal growth factor in pigs induces ductal proliferations in the pancreas. *Gastroenterology* 113: 1367–1374.
56. Pulkkinen MA, Spencer-Dene B, Dickson C, Otonkoski T (2003) The IIIb isoform of fibroblast growth factor receptor 2 is required for proper growth and branching of pancreatic ductal epithelium but not for differentiation of exocrine or endocrine cells. *Mech Dev* 120: 167–175.
57. Ye F, Duvillie B, Scharfmann R (2005) Fibroblast growth factors 7 and 10 are expressed in the human embryonic pancreatic mesenchyme and promote the proliferation of embryonic pancreatic epithelial cells. *Diabetologia* 48: 277–281.
58. Elghazi L, Cras-Meneur C, Czernichow P, Scharfmann R (2002) Role for FGFR2IIIb-mediated signals in controlling pancreatic endocrine progenitor cell proliferation. *Proc Natl Acad Sci U S A* 99: 3884–3889.
59. Sonnenberg E, Meyer D, Weidner KM, Birchmeier C (1993) Scatter factor/hepatocyte growth factor and its receptor, the c-met tyrosine kinase, can mediate a signal exchange between mesenchyme and epithelia during mouse development. *J Cell Biol* 123: 223–235.
60. Beattie GM, Rubin JS, Mally MI, Otonkoski T, Hayek A (1996) Regulation of proliferation and differentiation of human fetal pancreatic islet cells by extracellular matrix, hepatocyte growth factor, and cell-cell contact. *Diabetes* 45: 1223–1228.
61. Scharfmann R (2000) Control of early development of the pancreas in rodents and humans: implications of signals from the mesenchyme. *Diabetologia* 43: 1083–1092.
62. Oberg-Welsh C, Sandler S, Andersson A, Welsh M (1997) Effects of vascular endothelial growth factor on pancreatic duct cell replication and the insulin production of fetal islet-like cell clusters in vitro. *Mol Cell Endocrinol* 126: 125–132.
63. Rooman I, Schuit F, Bouwens L (1997) Effect of vascular endothelial growth factor on growth and differentiation of pancreatic ductal epithelium. *Lab Invest* 76: 225–232.
64. Jacquemin P, Yoshitomi H, Kashima Y, Rousseau GG, Lemaigre FP, et al. (2006) An endothelial-mesenchymal relay pathway regulates early phases of pancreas development. *Dev Biol* 290: 189–199.
65. Banerjee M, Otonkoski T (2009) A simple two-step protocol for the purification of human pancreatic beta cells. *Diabetologia* 52: 621–625.
